# Supplementary material
Source: PubMed Central journal article supplement (PMC6111005)

19

## Supplementary Materials: Figures and Tables.

20 **Figure Captions.**

21

22 **Supplemental Figure 1.** Principal components of expression for DEX and Sham treated LCLs showing  
23 technical replicates. Multidimensional Scaling (MDS) was used to identify principle components. Each  
24 array is shown as either DEX or Sham treated and technical replicates are over plotted with an X and  
25 linked by lines. A short or no line indicates good experimental control. A long horizontal line suggests  
26 that treatment condition was mislabeled.

27

28 **Supplemental Figure 2.** Principal components of paired DEX Sham LCL expression arrays after QC.  
29 The paired DEX Sham arrays for each subject are linked by a line.

30

31 **Supplemental Figure 3.** Distribution of Steroid Responsiveness Endophenotype (SRE) among 104 CAMP  
32 participants included in Network modeling.

33

34 **Supplemental Figure 4.** The seven first-degree SRE neighbor genes displayed on a typical differential  
35 expression volcano plot of LCL differential DEX expression ( $\log_2(\text{DEX}) - \log_2(\text{Sham})$ ). Typical gene  
36 selection significance (*e.g.*, corrected p-value < 0.05) and fold change (*e.g.*, +/- 2 fold) cutoffs would have  
37 identified only one of the genes identified by the interaction network.

38

39 **Supplemental Figure 5.** The association of LCL DEX response ( $\log_2(\text{DEX}) - \log_2(\text{Sham})$ ) with SRE for  
40 first-degree SRE neighbor genes. A simple linear regression line and its associated p-value are shown.

41

42 **Supplementary Figure 6.** Effects of candidate genes EDARADD and FICD on NF $\kappa$ B activation and  
43 anti-inflammation effect of glucocorticoid. (A) A549/NF $\kappa$ B-Luc cells were transfected with non-  
44 targeting (NT) siRNA or siRNA targeting candidate genes, and 88 h later mRNA levels of candidate gene  
45 were measured using qPCR and normalized to the level in control siRNA transfected cells. (B)  
46 A549/NF $\kappa$ B-Luc cells were transfected with siRNA as in (A). 72 h after transfection, cells were treated  
47 with 5 ng/mL IL1 $\beta$  for 16h. The luciferase (Luc) activity was measured and normalized with the amount  
48 of total protein. The Luc level was shown relative to that of untreated NT siRNA transfected cells. (C) In  
49 the same experiment as shown in (B), additional groups of cells were treated with 5 ng/mL IL1 $\beta$ +100 nM  
50 DEX and the Luc level normalized with that upon 5 ng/mL IL1 $\beta$  treatment to determine the percentage  
51 values shown. \*\*,  $P < 0.01$ ; \*\*\*,  $P < 0.005$ ; n.s., no significant difference.

52

53 **Supplemental Figure 7.** Two methods of measuring Specific Heat vs Temperature during generation and  
54 convergence of the second ensemble of 256 networks. Temperature is a parameter of the Markov Chain  
55 Monte Carlo simulation used to converge the REFS model. Specific Heat (CV) is a measure of change in  
56 model complexity per unit Temperature. CV can be computed as variance of ensemble scores (E) divided  
57 by  $T^2$ .  $dE/dT$  refers to change in ensemble score (E) over change in temperature and represents a  
58 different method of estimating specific heat. The simulation runs from right to left, starting at high  
59 Temperature, moving to lower Temperature. As Temperature decreases, the Model Specific Heat  
60 increases, indicating more rapid convergence of the Model, until the Temperature reaches  $\sim 1.5$ , when  
61 Specific Heat begins to decrease and the Model makes smaller improvements toward convergence. The  
62 two graphs may (and in this case do) diverge slightly because the CV method of estimation is sensitive to

63 appearances of local minima in the ensemble and the red curve may bend upwards once ensembles are  
64 reaching local minima. A ratio of CV to  $dE/dT$  is  $\leq 2$  indicates acceptable Model convergence.

65

66 **Supplemental Figure 8.** Ensemble Score vs Temperature during generation and convergence of the  
67 second ensemble of 256 networks. Temperature is a parameter of the Markov Chain Monte Carlo  
68 simulation used to converge the REFS model. Mean Cost is a measure of model complexity, which  
69 decreases as the Temperature decreases. Specific Heat (Supplemental Figure 7) tracks the derivative of  
70 Mean Cost. The simulation runs from right to left, starting at high Temperature, moving to lower  
71 Temperature. Horizontal ticks in the plot indicate individual temperature steps in the MCMC simulation  
72 (shown with the fit line). This plot shows convergence of the second REFS Ensemble reached when the  
73 MCMC simulation ends at Temperature=1.

74 **Supplemental Figure 9.** Neighborhoods of the 7 direct neighbors of SRE from the second REFS  
75 network Interaction Network. Edge width is proportional to, and edges are labeled with, the proportion of  
76 the 256 ensemble networks that contain the edge. Vertex type is indicated by a red star: SRE; circle: gene.  
77 Neighborhoods, indicated by colored outlines, were determined as described in methods. Symbol size is  
78 proportional to the number of all interaction network edges incident on the vertex, some of which may not  
79 be shown. The figures were plotted using the same layout as Figure 2.

80

81 **Supplemental Tables.**

82

83 Supplemental Table 1.

84

| <b>SRE 1<sup>st</sup> Neighbor<br/>Gene</b> | <b>Freq</b> | <b>Baseline<br/>mean</b> | <b>SRE<br/>effect</b> | <b>P-<br/>value</b> | <b>Correlation</b> | <b>Correlation<br/>P-value</b> | <b>Illumina Probe<br/>ID</b> |
|---------------------------------------------|-------------|--------------------------|-----------------------|---------------------|--------------------|--------------------------------|------------------------------|
| CEP152                                      | 0.754       | -0.015                   | 0.180                 | 0.007               | 0.826              | <0.001                         | ILMN_1732311                 |
| EDARADD                                     | 0.750       | 0.007                    | 0.104                 | 0.012               | 0.657              | <0.001                         | ILMN_1761820                 |
| FAF1                                        | 0.617       | 0.052                    | -0.135                | 0.026               | 0.894              | <0.001                         | ILMN_1666634                 |
| FAM129A                                     | 0.578       | -0.240                   | 0.109                 | 0.039               | 0.835              | <0.001                         | ILMN_1810725                 |
| FAM174B                                     | 0.742       | 0.961                    | 0.156                 | 0.020               | 0.774              | <0.001                         | ILMN_1652797                 |
| FICD                                        | 0.879       | -0.189                   | 0.152                 | 0.001               | 0.682              | <0.001                         | ILMN_1778064                 |
| YY1                                         | 0.949       | -0.063                   | 0.143                 | <0.001              | 0.777              | <0.001                         | ILMN_1770892                 |

85

86 Supplemental Table 1. Descriptive statistics for SRE first-neighbor genes in the interaction network  
87 produced from the second REFS Ensemble of 256 networks. Baseline mean, SRE effect, and p-value,  
88 were produced from REFS all-versus-all simulation that perturbs every variable and determines the effect  
89 on every other variable. Correlation and Correlation p-value are produced by simulating the maximum  
90 likelihood estimates for these genes and comparing to DEX response data. Edges were created in the  
91 interaction network for every such effect with a P-value of < 0.05 (labeled “P-value” above). Freq: the

92 proportion of Ensemble networks that contain an edge connecting SRE with the gene. Baseline mean:  
93 Mean simulated value; average LCL DEX response ( $\text{Log}_2(\text{DEX}) - \text{Log}_2(\text{sham})$ ). SRE effect: Mean  
94 simulated change from baseline due to perturbation of SRE; estimated  $\log_2$  fold change effect on LCL  
95 DEX response caused by perturbation of SRE. P-value: P-value of the SRE effect. Correlation: Spearman  
96 correlation of simulated response vs observed DEX response ( $\text{Log}_2(\text{DEX}) - \text{Log}_2(\text{sham})$ ). Correlation P-  
97 value: P-Value of the spearman correlation statistic.

98

100

|          | <b>AUC (95% conf)</b> | <b>p-value vs. SRE</b> |
|----------|-----------------------|------------------------|
| SRE      | 0.76 (0.70-0.81)      | -                      |
| AMSYMP   | 0.66 (0.59-0.72)      | <.001                  |
| PREFEV   | 0.68 (0.62-0.74)      | 0.001                  |
| LNPC20   | 0.68 (0.61-0.74)      | 0.018                  |
| BDRABPCT | 0.61 (0.54-0.67)      | <.001                  |
| EDHOS    | 0.58 (0.53-0.63)      | <.001                  |
| BURSTS   | 0.62 (0.56-0.67)      | <.001                  |

101

102 Supplemental Table 2. The accuracy (AUC and lower and upper 95% confidence interval) with which  
103 ICS responsiveness was measured in cohort subjects. SRE = Steroid Responsiveness Endophenotype;  
104 AMSYMP = asthma symptoms; PREFEV = pre-bronchodilator FEV1; LNPC20 = airway responsiveness,  
105 natural log provocative concentration of methacholine required to effect 20% reduction in FEV1;  
106 BDRABPCT = bronchodilator response, percent change; EDHOS = Emergency Department visit or  
107 Hospitalization for asthma; BURSTS = supplemental oral corticosteroid courses required for asthma  
108 symptom control. P-values are single-sided p-values showing difference in AUC from SRE.

109

110

111 Supplemental Table 3.

| Differential Expression Cutoff                  | Connected to SRE | Not Connected | Total |
|-------------------------------------------------|------------------|---------------|-------|
| $p \geq 0.05$                                   | 2348 (87%)       | 334           | 2682  |
| $p < 0.05$ & $ \text{Log}_2(\text{FC})  \leq 1$ | 931 (91%)        | 95            | 1026  |
| $p < 0.05$ & $ \text{Log}_2(\text{FC})  > 1$    | 23 (96%)         | 1             | 24    |
| Total                                           | 3302 (88%)       | 430           | 3732  |

112

113 Supplemental Table 3. Occurance of training set genes from the second REFS ensemble interaction

114 network grouped by SRE connection status and differential expression cutoff. Connected to SRE: genes

115 that were connected directly or indirectly to SRE in the SRE subgraph of the interaction network. Not

116 Connected: genes that were located in isolated subgraphs (Total N = 28) or not present in the

117 interaction network (Total N = 419).

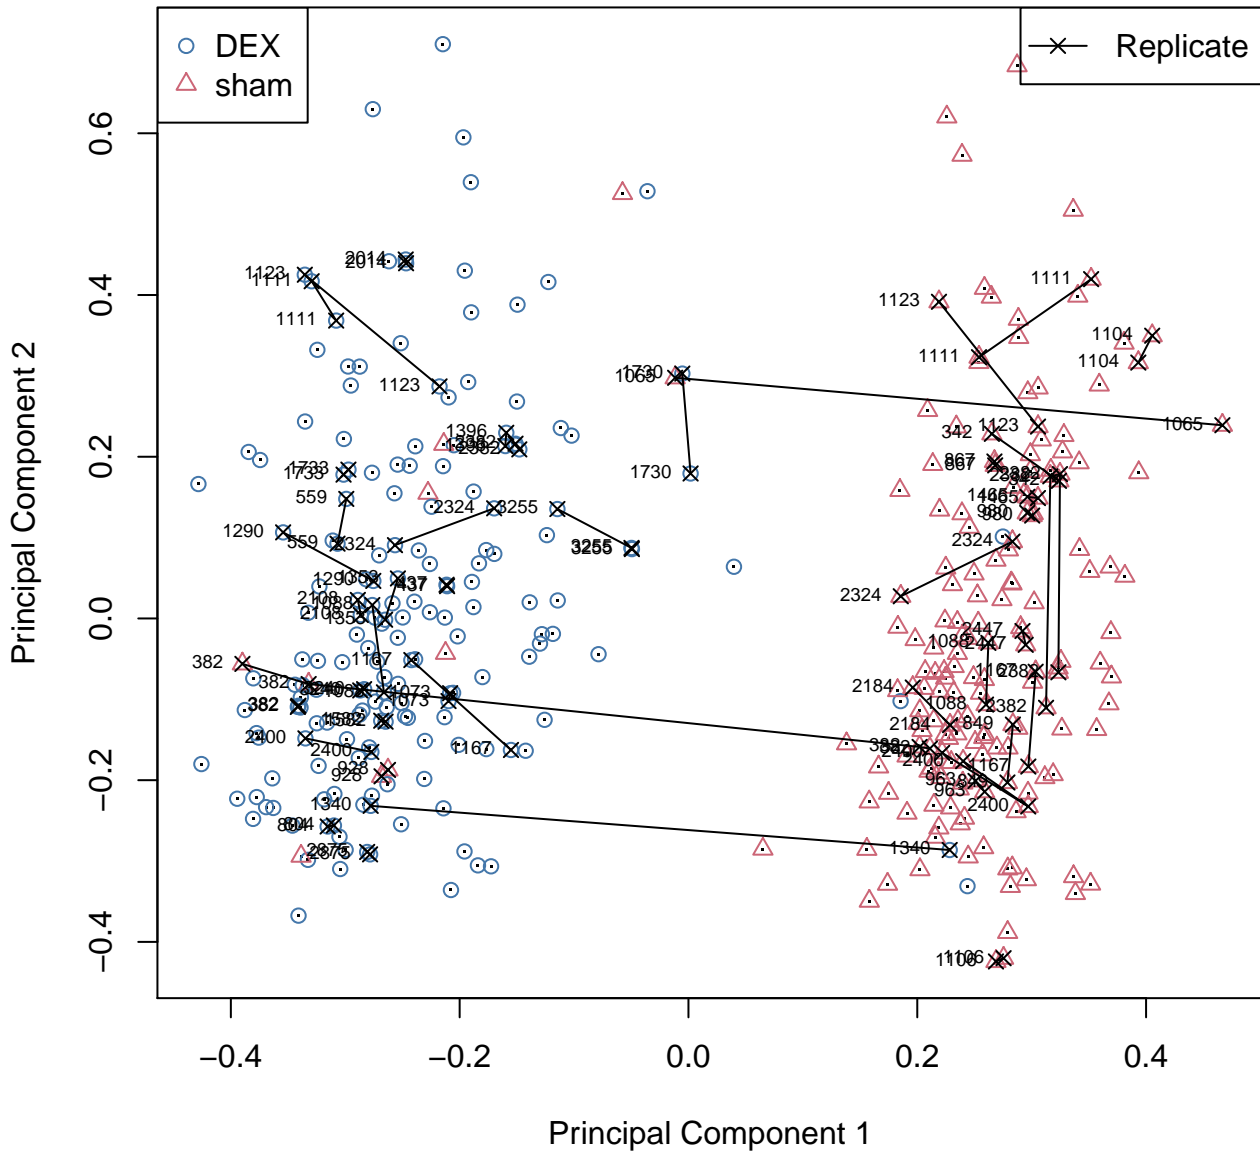



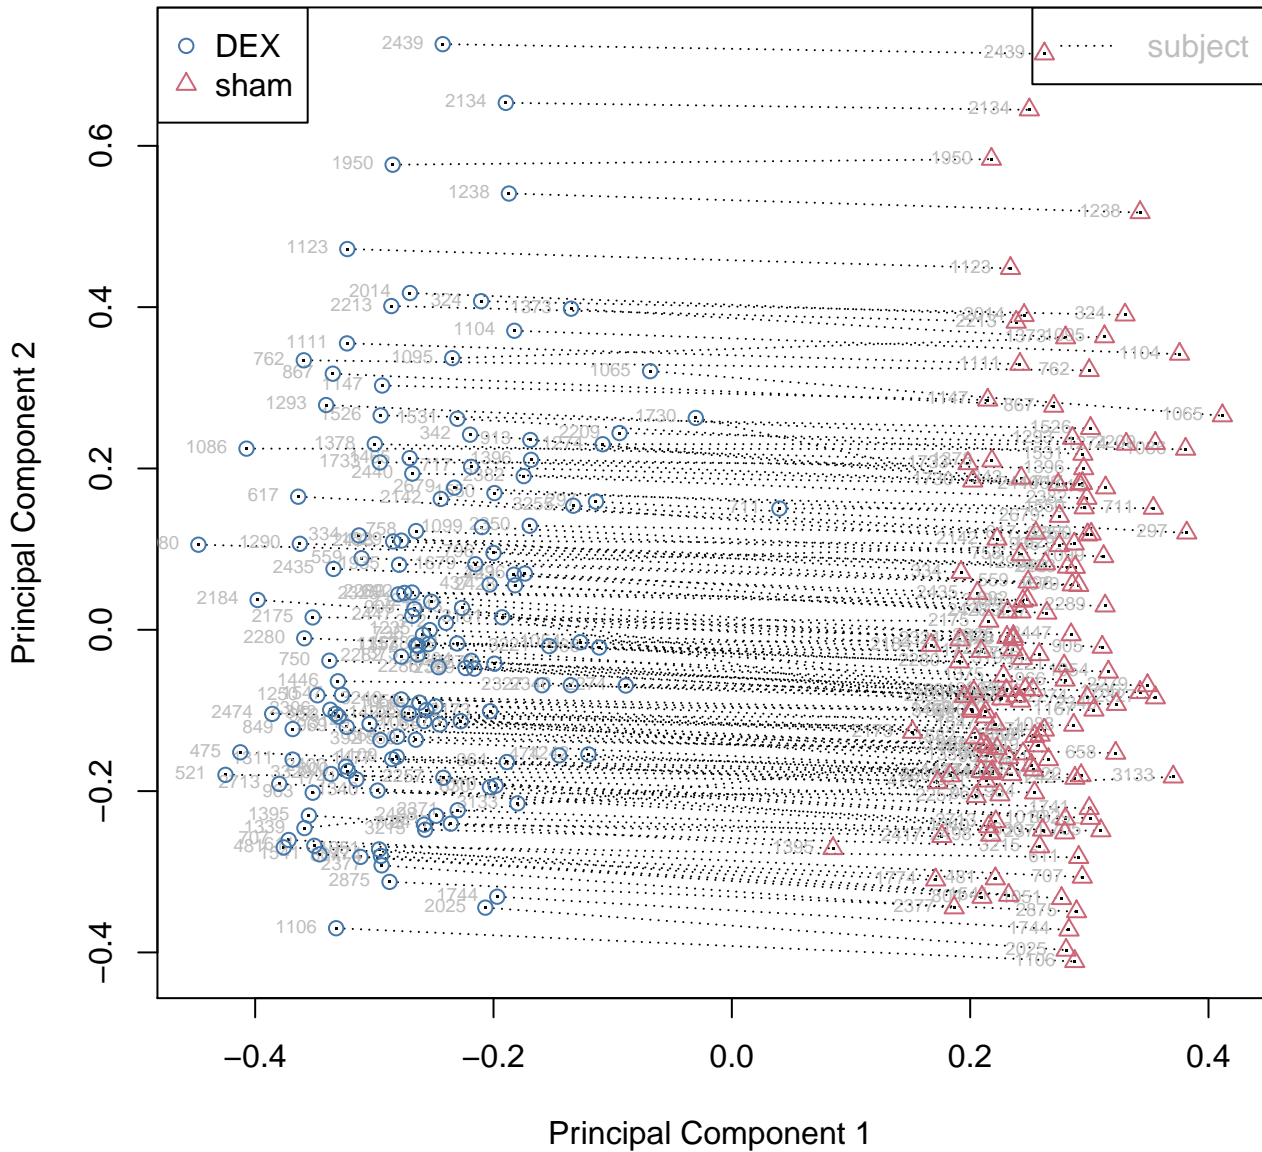

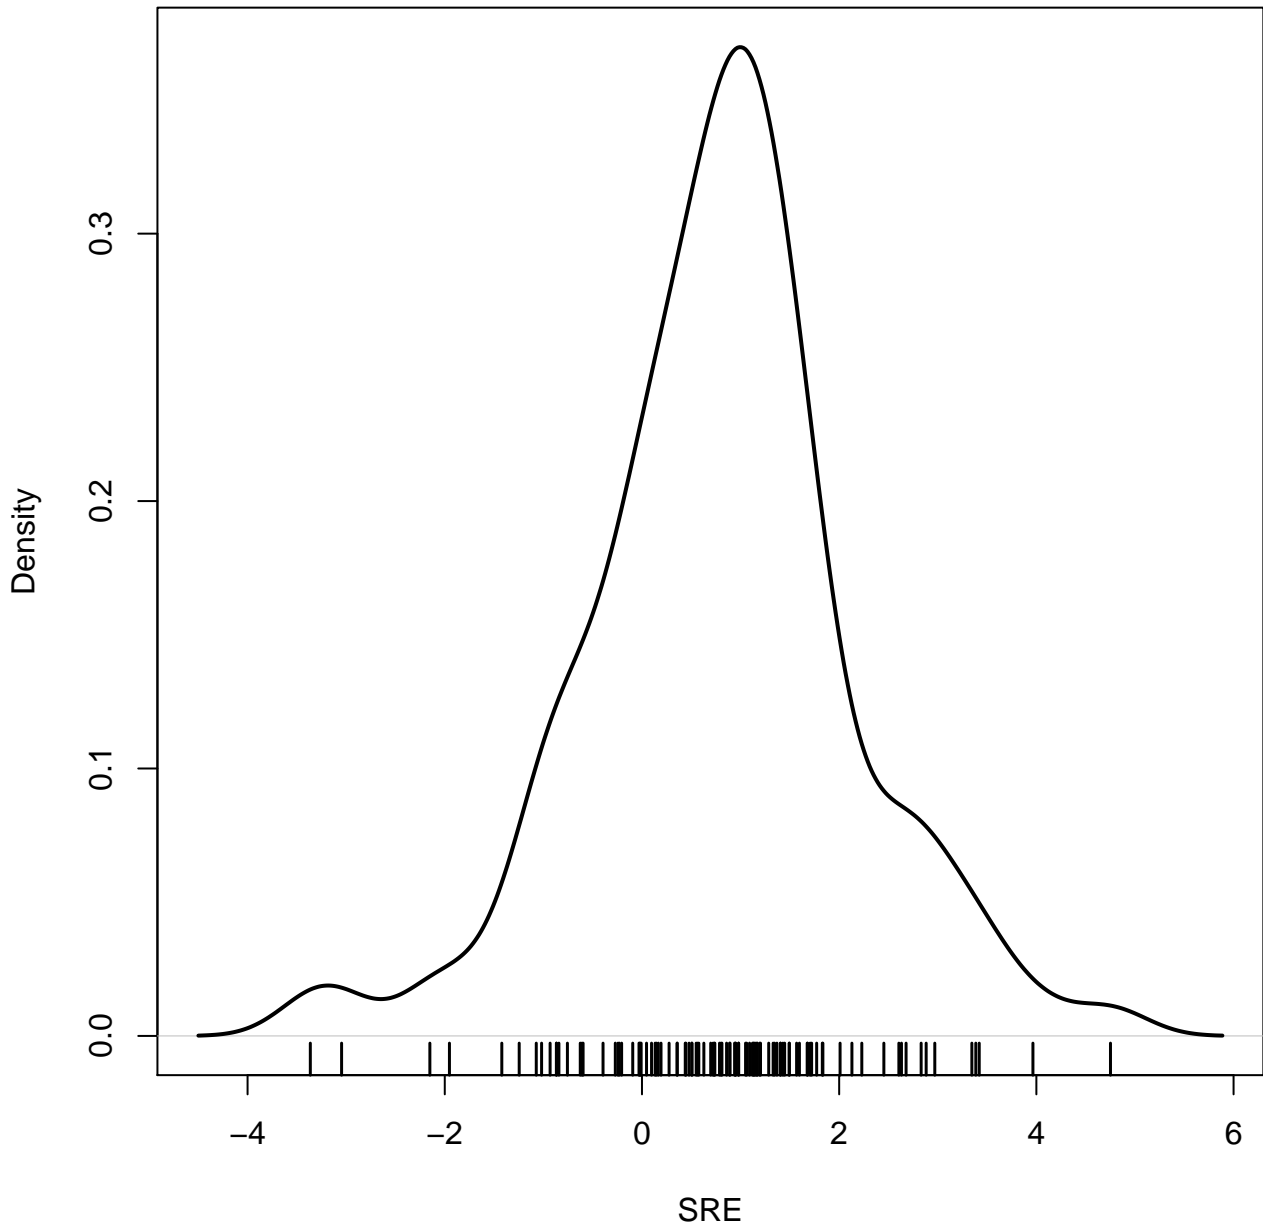

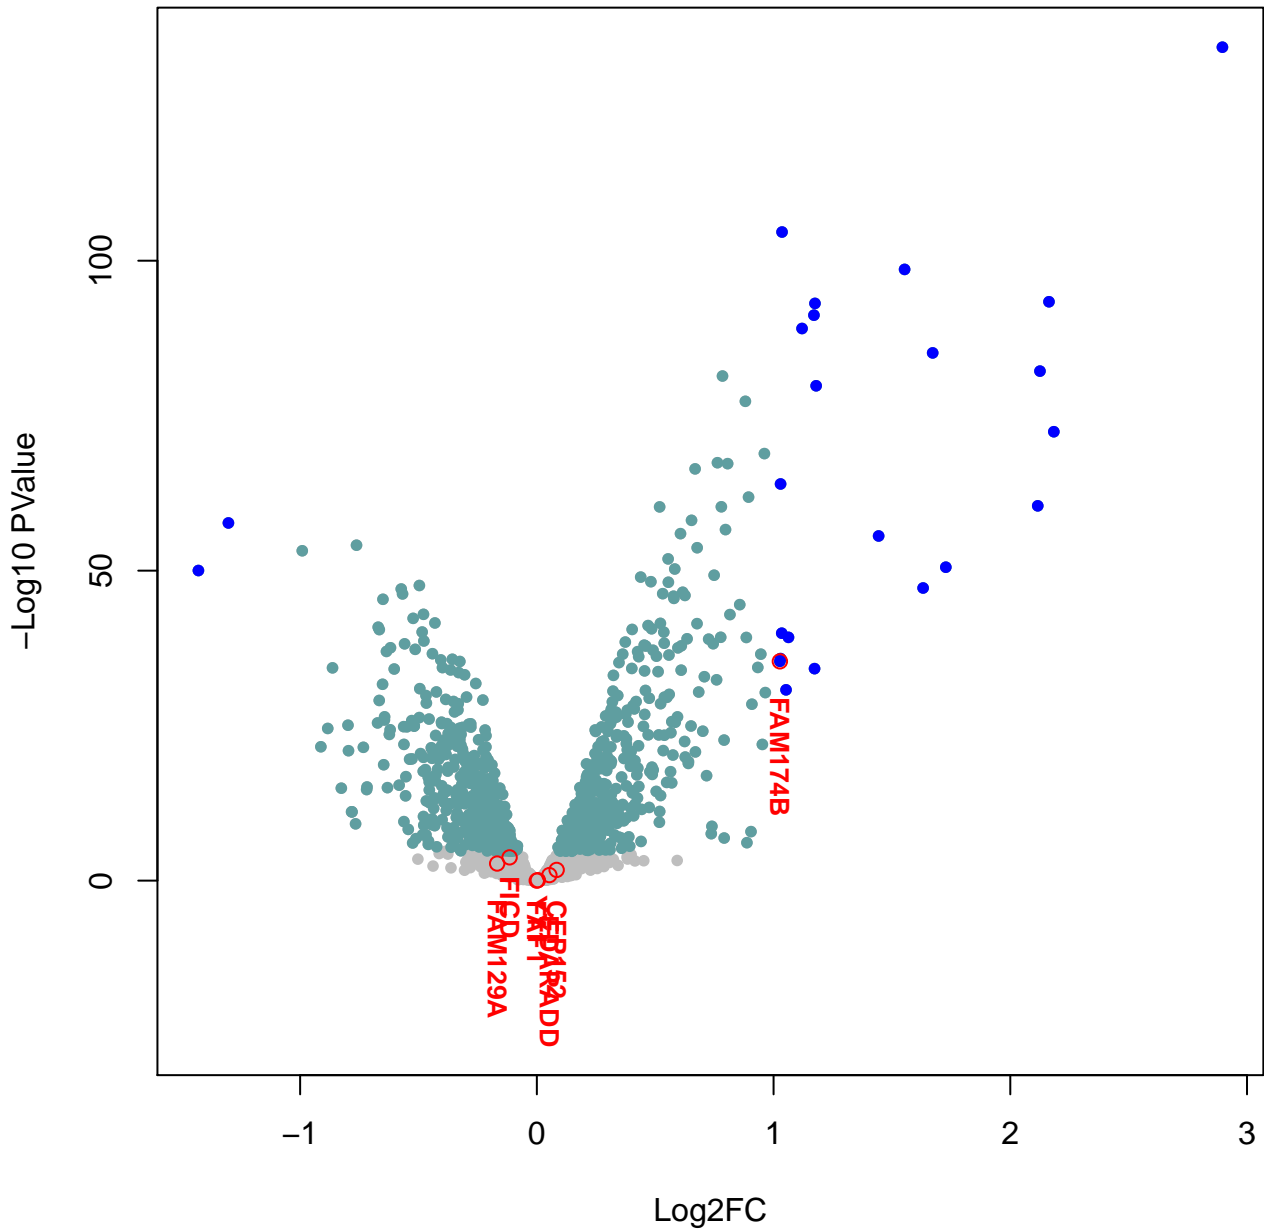

**CEP152**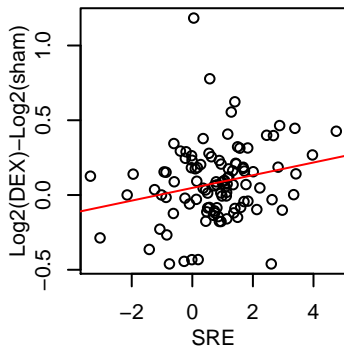**EDARADD**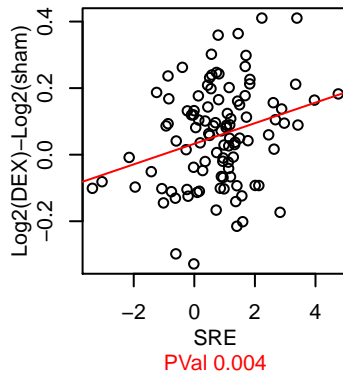**FAF1**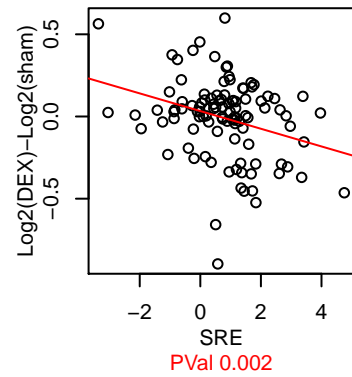**FAM129A**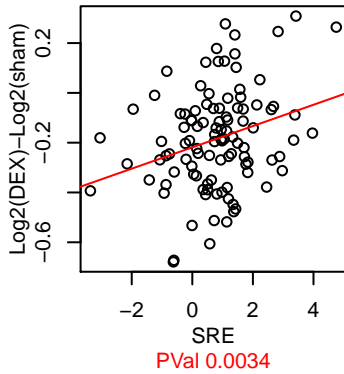**FAM174B**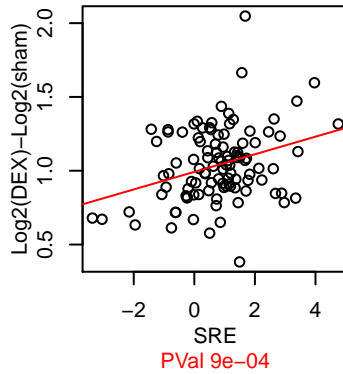**FICD**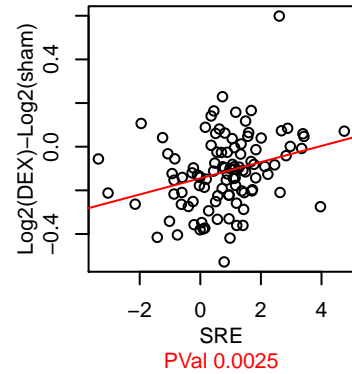**YY1**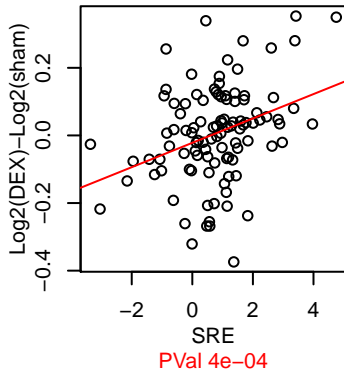

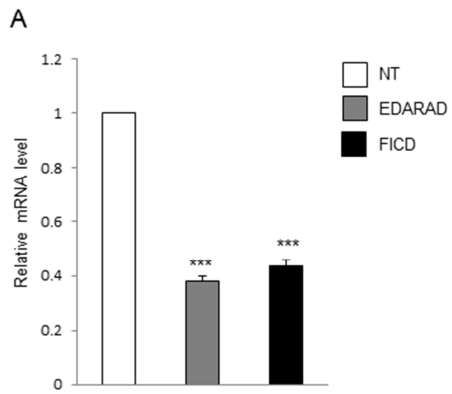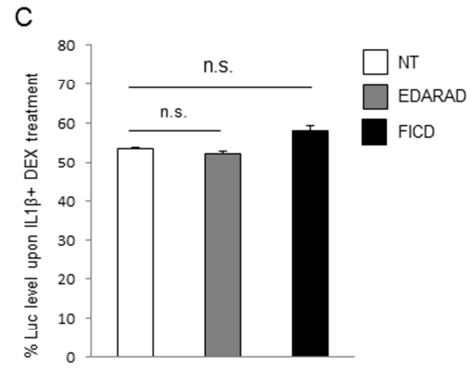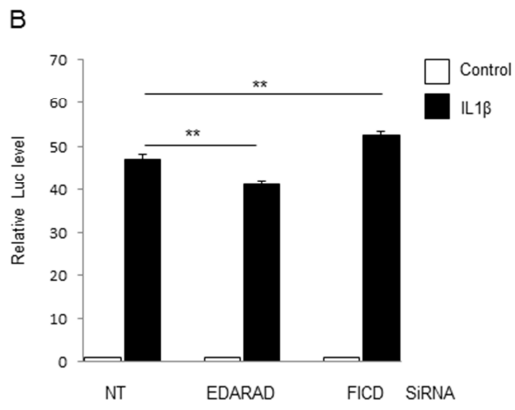

Specific Heat vs. Temperature

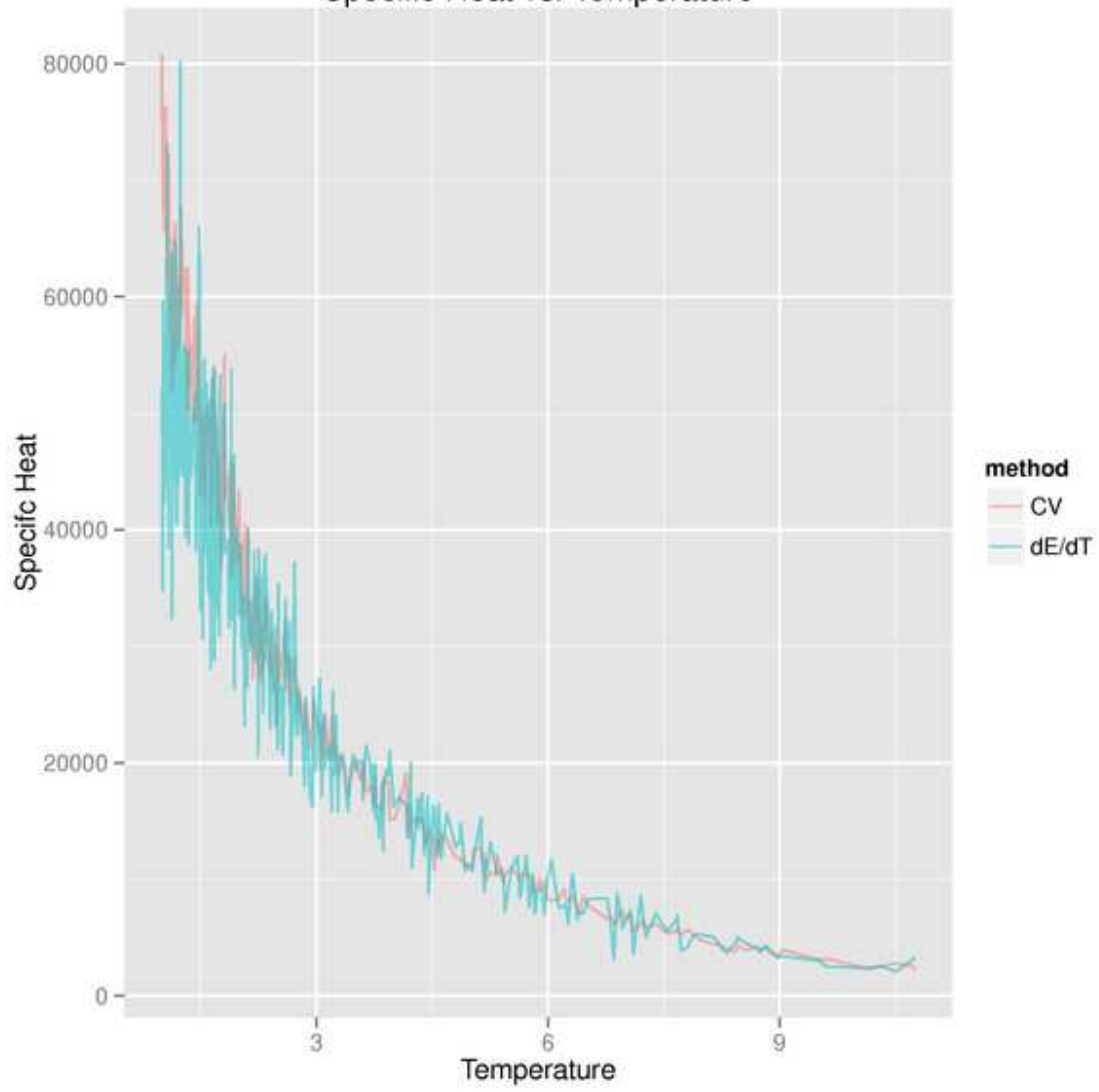

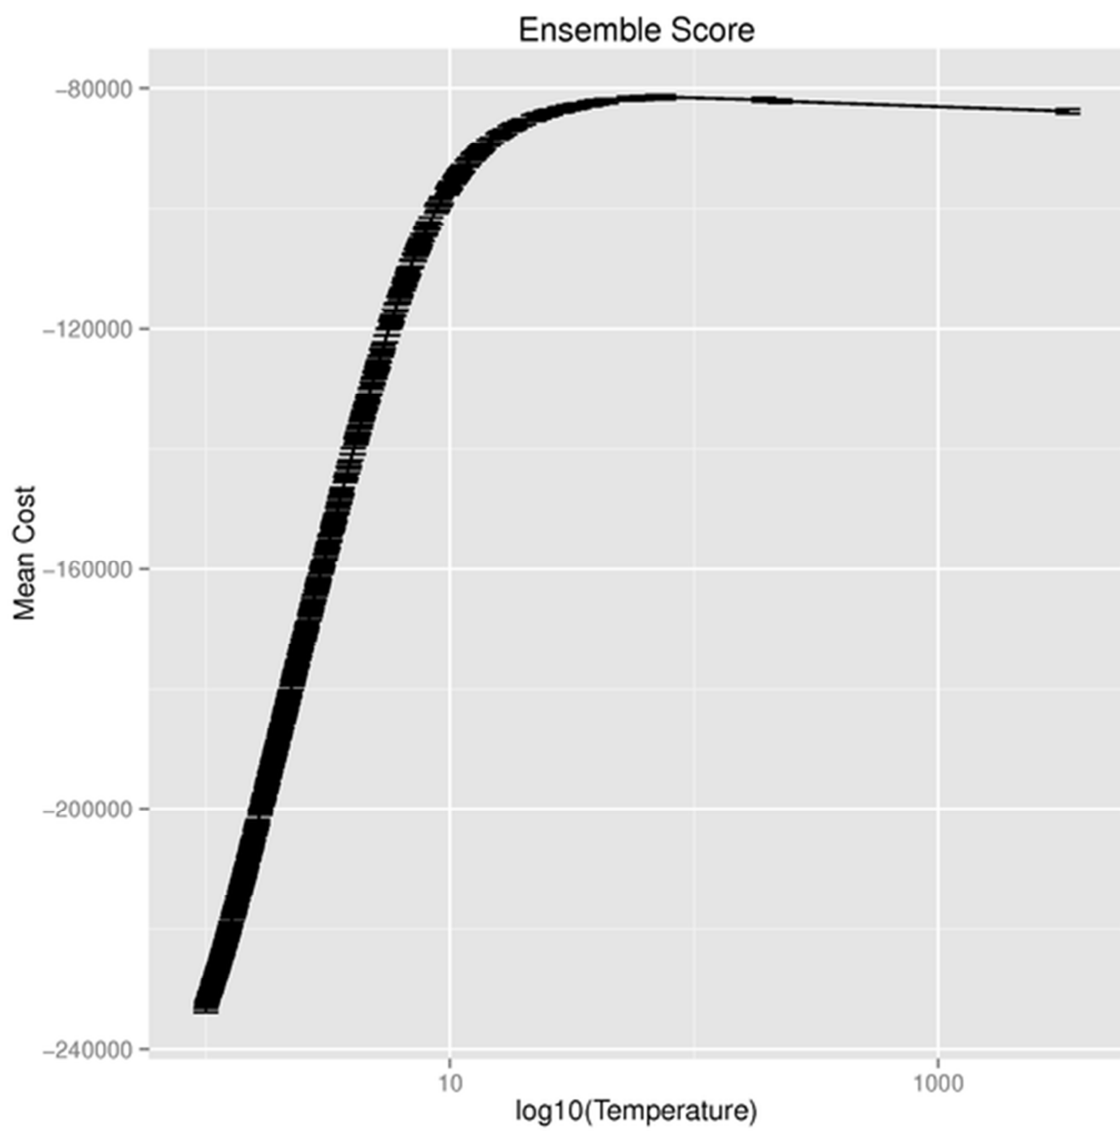

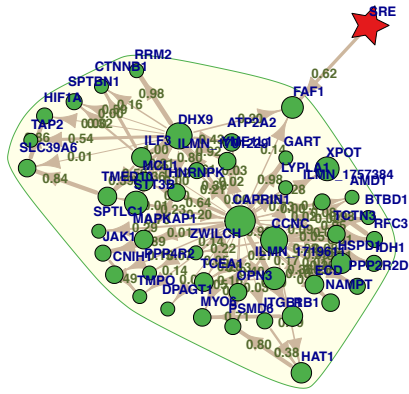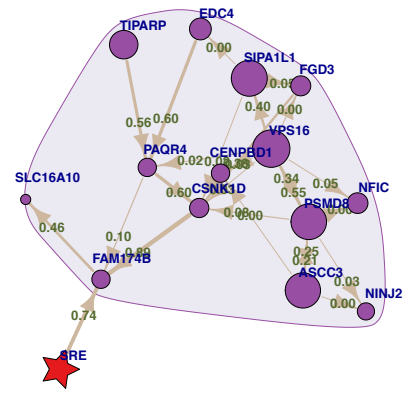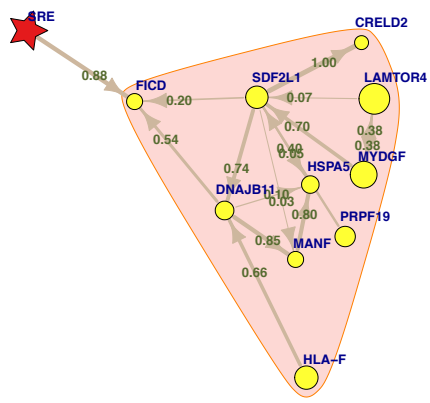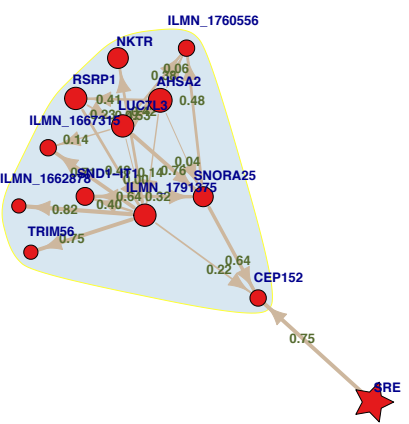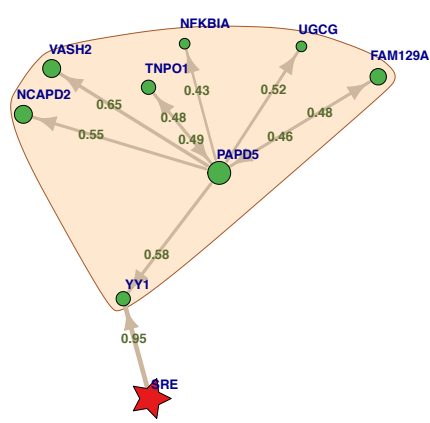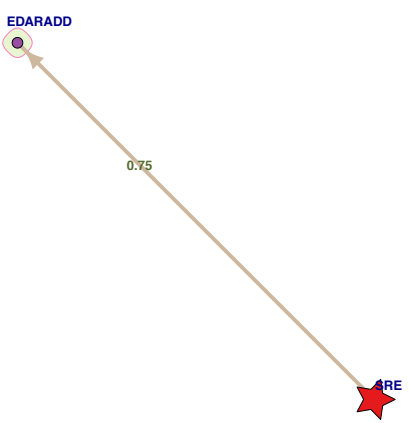

Supplement: NIHMS947588-supplement-supplement_1.pdf [file NIHMS947588-supplement-supplement_1.pdf]
